# Supplementary material for: Impact of traffic volumes on levels, patterns, and toxicity of polycyclic aromatic hydrocarbons in roadside soils
Source: Royal Society of Chemistry journal article supplement (doi:10.1039/c8em00532j), 2019-01-01
Supplement: c8em00532j1.pdf [file c8em00532j1.pdf]

**Supplementary Information for**

**Impact of traffic volumes on levels, patterns, and toxicity of polycyclic aromatic hydrocarbons in roadside soils**

Seong-Joon Kim,<sup>a</sup> Min-Kyu Park,<sup>a</sup> Sung-Eun Lee,<sup>b</sup> Hye-Jung Go,<sup>a</sup> Byung-Chae Cho,<sup>a</sup>  
Yoon-Se Lee,<sup>c</sup> Sung-Deuk Choi<sup>\*a,c</sup>

<sup>a</sup>*School of Urban and Environmental Engineering, Ulsan National Institute of Science and Technology (UNIST), Ulsan, 44919, Republic of Korea*

<sup>b</sup>*School of Applied Biosciences, Kyungpook National University, Daegu, 41566, Republic of Korea*

<sup>c</sup>*UNIST Environmental Analysis Center (UEAC), Ulsan National Institute of Science and Technology (UNIST), Ulsan, 44919, Republic of Korea*

| <b>Content</b> |                                                                                                                       | <b>Page</b> |
|----------------|-----------------------------------------------------------------------------------------------------------------------|-------------|
| Table S1       | Risk parameters used for Monte-Carlo simulation for children and adults                                               | S2          |
| Table S2       | Concentrations (ng/g) of individual and total PAHs in roadside soils                                                  | S3          |
| Table S3       | Concentrations of $\Sigma_{16}$ PAHs in roadside soils collected from other cities in previous studies and this study | S3          |
| Text S1        | References                                                                                                            | S4          |

---

\*Corresponding author. Tel: +82 52 217 2811; fax: +82 52 217 2859.  
E-mail address: [sdchoi@unist.ac.kr](mailto:sdchoi@unist.ac.kr) (S.-D. Choi).

**Table S1.** Risk parameters used for Monte-Carlo simulation for children and adults.

| Input parameter           | Description (unit)                                             | Children                    | Adults         | Data distribution | Reference  |
|---------------------------|----------------------------------------------------------------|-----------------------------|----------------|-------------------|------------|
| C <sub>soil</sub>         | BaP equivalent concentration (mg/kg)                           | G (0.13, 2.18) <sup>a</sup> | G (0.13, 2.18) | log normal        | This study |
| ED                        | exposure duration (year)                                       | U (0, 18) <sup>b</sup>      | U (0, 52)      | uniform           | This study |
| EF                        | exposure frequency (day/year)                                  | G (252, 1.01)               | G (252, 1.01)  | log normal        | 1          |
| BW                        | body weight (kg)                                               | A (35.9, 19.2) <sup>c</sup> | A (62.8, 10.9) | log normal        | 2, 3       |
| AT                        | averaging time (day)                                           | 25,550                      | 25,550         | constant          |            |
| CF                        | conversion factor (kg/mg)                                      | 1.00E-06                    | 1.00E-06       | constant          |            |
| IR <sub>soil</sub>        | soil ingestion rate (mg/day)                                   | 118                         | 50             | constant          | 2, 4       |
| HR                        | air inhalation rate (m <sup>3</sup> /day)                      | A (12.1, 2.1)               | A (14.3, 1.1)  | log normal        | 2, 3       |
| PEF <sub>soil</sub>       | soil particle emission factor (m <sup>3</sup> /kg)             | 1.32E+09                    | 1.32E+09       | constant          | 5          |
| SA                        | surface area of skin that contacts soil (cm <sup>2</sup> /day) | A (2938, 1171)              | A (4271, 440)  | log normal        | 2, 3       |
| AF                        | relative skin adherence factor (mg/cm <sup>2</sup> )           | 0.10                        | 0.08           | constant          | 4, 6       |
| ABS                       | dermal absorption factor                                       | G (0.13, 1.26)              | G (0.13, 1.26) | log normal        | 7          |
| CSF <sub>ingestion</sub>  | cancer slope factor for BaP (mg/kg/day)                        | 12                          | 12             | constant          | 8          |
| CSF <sub>inhalation</sub> | cancer slope factor for BaP (mg/kg/day)                        | 3.9                         | 3.9            | constant          | 8          |
| CSF <sub>dermal</sub>     | cancer slope factor for BaP (mg/kg/day)                        | 37.5                        | 37.5           | constant          | 9          |

<sup>a</sup> G (gm, gsd): Geometric mean and standard deviation. <sup>b</sup> U (min, max). <sup>c</sup> A (m, sd): Arithmetic mean and standard deviation.

**Table S2.** Concentrations (ng/g) of individual and total PAHs in roadside soils collected at 10 sites in Ulsan, Korea.

|                    | Site 1 | Site 2 | Site 3 | Site 4 | Site 5 | Site 6 | Site 7 | Site 8 | Site 9 | Site 10 |
|--------------------|--------|--------|--------|--------|--------|--------|--------|--------|--------|---------|
| Nap                | 61     | 71     | 68     | 63     | 66     | 78     | 73     | 77     | 78     | 91      |
| Acy                | 45     | 39     | 48     | 42     | 32     | 44     | 41     | 42     | 48     | 49      |
| Ace                | 14     | 18     | 18     | 17     | 11     | 17     | 14     | 15     | 17     | 23      |
| Flu                | 10     | 15     | 12     | 16     | 9      | 16     | 12     | 13     | 19     | 23      |
| Phe                | 24     | 64     | 51     | 53     | 30     | 71     | 67     | 83     | 101    | 137     |
| Ant                | ND*    | 26     | 31     | 26     | 20     | 30     | 31     | 31     | 40     | 41      |
| Flt                | 53     | 63     | 92     | 103    | 51     | 91     | 109    | 148    | 154    | 199     |
| Pyr                | 59     | 65     | 94     | 116    | 65     | 111    | 188    | 178    | 237    | 354     |
| BaA                | 93     | 83     | 112    | 90     | 66     | 97     | 88     | 94     | 103    | 103     |
| Chr                | 26     | 40     | 62     | 51     | 28     | 57     | 114    | 91     | 105    | 100     |
| BbF                | 45     | 55     | 91     | 59     | 38     | 63     | 79     | 81     | 112    | 99      |
| BkF                | ND     | 20     | 37     | 23     | 14     | 28     | 28     | 27     | 36     | 29      |
| BaP                | ND     | 70     | 104    | 81     | 60     | 90     | 88     | 93     | 113    | 113     |
| IcdP               | ND     | 50     | 74     | 70     | 37     | 64     | 67     | 67     | 96     | 92      |
| DahA               | ND     | 38     | 46     | 51     | 32     | 48     | 39     | 44     | 47     | 46      |
| BghiP              | 34     | 69     | 63     | 175    | 82     | 112    | 220    | 184    | 346    | 323     |
| $\Sigma_{16}$ PAHs | 310    | 784    | 1,004  | 1,037  | 639    | 1,016  | 1,258  | 1,270  | 1,652  | 1,820   |

\*ND: Not Detected.

**Table S3.** Concentrations of  $\Sigma_{16}$  PAHs in roadside soils collected from other cities in previous studies and this study.

| Country | City     | Period           | Mean ( $\mu\text{g/g}$ ) | Range ( $\mu\text{g/g}$ ) | Reference  |
|---------|----------|------------------|--------------------------|---------------------------|------------|
| China   | Xi'an    | NA*              | 2.6                      | 0.4–9.9                   | 10         |
| China   | Xi'an    | December 2016    | 1.3                      | NA–2.5                    | 11         |
| Mexico  | Tijuana  | NA               | 0.3                      | 0.05–1.9                  | 12         |
| Serbia  | Novi Sad | Winter 2014–2015 | 0.7                      | single sample             | 13         |
| UK      | London   | April 2009       | 65                       | single sample             | 14         |
| Korea   | Ulsan    | October 2011     | 1.1                      | 0.3–1.8                   | This study |

\*NA: Not Available.

## Text S1. References.

1. S. C. Chen and C. M. Liao, Health risk assessment on human exposed to environmental polycyclic aromatic hydrocarbons pollution sources, *Sci. Total Environ.*, 2006, **366**, 112-123.
2. NIER, *Korean Exposure Factors Handbook for Children*, National Institute of Environmental Research, Ministry of Environment, Korea, 2016.
3. MOE, *Korean exposure factors handbook*, Ministry of Environment, Korea, 2007.
4. US EPA, *Exposure Factors Handbook 2011 Edition*, National Center for Environmental Assessment, United States Environmental Protection Agency, USA, 2011.
5. US EPA, *Soil screening guidance: User's guide.* "Office of Solid Waste and Emergency Response, Office of Emergency and Remedial Response, United States Environmental Protection Agency, USA, 1996.
6. N. Cappelletti, M. Astoviza, M. Morrone and L. Tatone, Urban geochemistry and potential human health risks in the Metropolitan Area of Buenos Aires: PAHs and PCBs in soil, street dust, and bulk deposition, *Environ. Geochem. Health*, 2018, DOI: 10.1007/s10653-018-0163-3.
7. R. C. Wester, H. I. Maibach, D. A. W. Bucks, L. Sedik, J. Melendres, C. Liao and S. Dizio, Percutaneous absorption of [<sup>14</sup>C]DDT and [<sup>14</sup>C]Benzo[a]pyrene from soil, *Toxicol. Sci.*, 1990, **15**, 510-516.
8. CalEPA, *Technical Support Document for Cancer Potency Factors: Methodologies for Derivation, Listing of Available Values, and Adjustments to Allow for Early Life Stage Exposures. Appendix H: Exposure Routes and Studies Used to Derive Cancer Unit Risks and Slope Factors*, California Environmental Protection Agency, 2009.
9. M. Hussain, J. Rae, A. Gilman and P. Kauss, Lifetime health risk assessment from exposure of recreational users to polycyclic aromatic hydrocarbons, *Arch. Environ. Contam. Toxicol.*, 1998, **35**, 527-531.
10. L. Wang, P. Zhang, L. Wang, W. Zhang, X. Shi, X. Lu, X. Li and X. Li, Polycyclic Aromatic Hydrocarbons in Urban Soil in the Semi-arid City of Xi'an, Northwest China: Composition, Distribution, Sources, and Relationships with Soil Properties, *Arch. Environ. Contam. Toxicol.*, 2018, **75**, 351-366.
11. H. Bao, S. Hou, H. Niu, K. Tian, X. Liu and F. Wu, Status, sources, and risk assessment of polycyclic aromatic hydrocarbons in urban soils of Xi'an, China, *Environ Sci Pollut Res Int*, 2018, **25**, 18947-18959.
12. E. Garcia-Flores, F. T. Wakida, D. D. Rodríguez-Mendivil and H. Espinoza-Gomez, Polycyclic Aromatic Hydrocarbons in Road-Deposited Sediments and Roadside Soil in Tijuana, Mexico, *Soil Sediment Contam.*, 2016, **25**, 223-239.
13. B. D. Skrbic, N. Durisic-Mladenovic, D. J. Tadic and J. D. Cvejanov, Polycyclic aromatic hydrocarbons in urban soil of Novi Sad, Serbia: occurrence and cancer risk assessment, *Environ Sci Pollut Res Int*, 2017, **24**, 16148-16159.
14. C. H. Vane, A. W. Kim, D. J. Beriro, M. R. Cave, K. Knights, V. Moss-Hayes and P. C. Nathanail, Polycyclic aromatic hydrocarbons (PAH) and polychlorinated biphenyls (PCB) in urban soils of Greater London, UK, *Appl. Geochem.*, 2014, **51**, 303-314.
